# Supplementary material
Source: Elsevier journal article supplement (https://comptes-rendus.academie-sciences.fr/geoscience/article/10.1016/j.crte.2015.12.003/file/attach/mmc6.pdf)
Supplement: mmc6 [file mmc6.pdf]

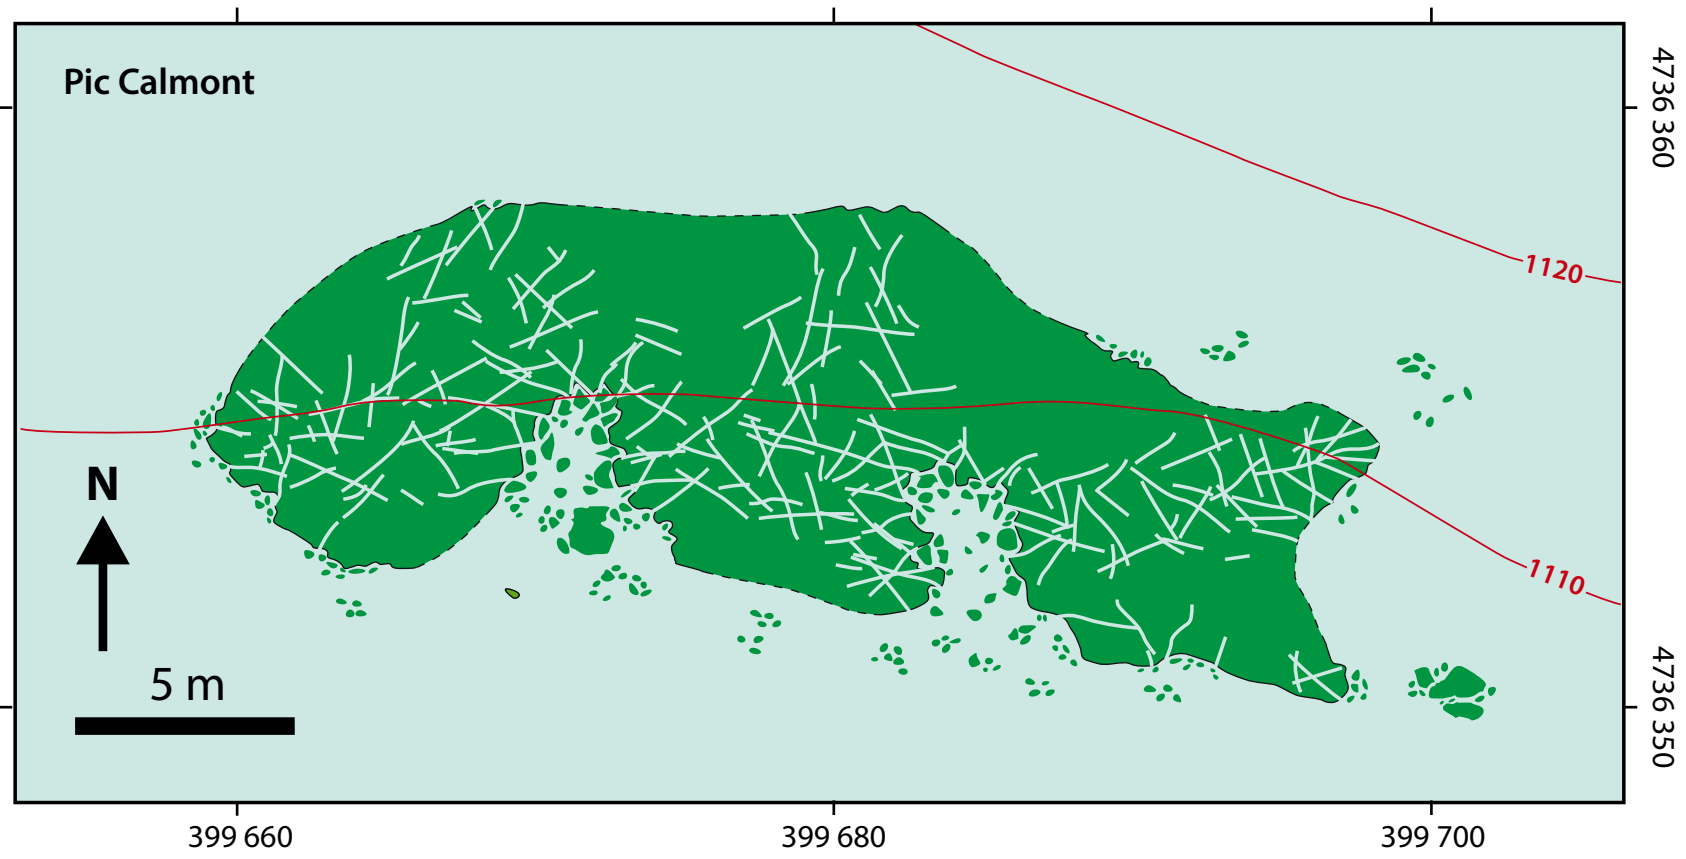

StBlanquat et al Figure SM 5
